# Supplementary material
Source: HighWire-hosted journal article supplement (https://www.annfammed.org/highwire/filestream/7523/field_highwire_adjunct_files/0/Feleus_Supp_Apps_1-2.pdf)
Supplement: Feleus_Supp_Apps_1-2.pdf [file Feleus_Supp_Apps_1-2.pdf]

Online Supplementary Material

Feleus A, Bierma-Zeinstra SMA, Bernsen RMD, Miedema HS, Verhaar JAN, Koes BW. Management decisions in non-traumatic complaints of arm, neck and shoulder in general practice. *Ann Fam Med*. 2009;7(5):446-454.

<http://www.annfammed.org/cgi/content/full/7/5/446/DC1>

| <b>Supplemental Table 1. Specific Diagnoses Included in Study</b>                                                  |            |
|--------------------------------------------------------------------------------------------------------------------|------------|
| <b>Diagnosis</b>                                                                                                   | <b>No.</b> |
| Cervical hernia                                                                                                    | 5          |
| Subacromial impingement syndrome (rotator cuff syndrome, tendinosis, bursitis)                                     | 220        |
| Frozen shoulder                                                                                                    | 9          |
| Biceps tendinosis                                                                                                  | 2          |
| Lateral/medial epicondylitis                                                                                       | 93         |
| Bursitis elbow                                                                                                     | 3          |
| Osteoarthritis of elbow (no rheumatoid arthritis)                                                                  | 2          |
| Cubital tunnel syndrome                                                                                            | 2          |
| Peritendinitis/tenosynovitis flexors/extensors forearm                                                             | 13         |
| de Quervain's syndrome                                                                                             | 13         |
| Guyon's tunnel syndrome                                                                                            | 5          |
| Radial tunnel syndrome                                                                                             | 1          |
| Carpal tunnel syndrome                                                                                             | 11         |
| Osteoarthritis of wrist or hand (no rheumatoid arthritis)                                                          | 14         |
| Free body of wrist or hand                                                                                         | 1          |
| Raynaud's phenomenon and peripheral neuropathy in combination with exposure to hand-arm vibration                  | 1          |
| Trigger finger                                                                                                     | 2          |
| Ganglion                                                                                                           | 5          |
| Nonspecific diagnoses: all other arm, neck, and shoulder complaints not attributable to trauma or systemic disease | 280        |

Online Supplementary Material

Feleus A, Bierma-Zeinstra SMA, Bernsen RMD, Miedema HS, Verhaar JAN, Koes BW. Management decisions in non-traumatic complaints of arm, neck and shoulder in general practice. *Ann Fam Med*. 2009;7(5)446-454.

<http://www.annfammed.org/cgi/content/full/7/5/446/DC1>

**Supplemental Table 2. Univariate Associations With Common Management Options; Results of Univariate Logistic Regression Analyses (Multilevel)**

| Variables                                                            | Watchful Waiting<br>OR (95% CI) | Additional Diagnostic Testing<br>OR (95% CI) | Prescription of Medication<br>OR (95% CI) | Steroid Injection<br>OR (95% CI) | Physical Therapist<br>OR (95% CI) | Medical Specialist<br>OR (95% CI) |
|----------------------------------------------------------------------|---------------------------------|----------------------------------------------|-------------------------------------------|----------------------------------|-----------------------------------|-----------------------------------|
| <b>Diagnosis</b>                                                     |                                 |                                              |                                           |                                  |                                   |                                   |
| Epicondylitis                                                        | 1.3 (0.8-2.0)                   | 0.3 (0.1-0.6)                                | 1.1 (0.8-1.6)                             | 2.2 (0.9-5.4)                    | 0.8 (0.3-1.8)                     | 1.3 (0.5-3.4)                     |
| Impingement, biceps tendonitis, frozen shoulder                      | 0.6 (0.4-1.0)                   | 0.5 (0.2-1.2)                                | 1.7 (1.2-2.4)                             | 9.5 (5.3-17.2)                   | 0.5 (0.3-0.8)                     | 2.2 (1.0-4.5)                     |
| Other specific diagnosis                                             | 1.2 (0.8-1.8)                   | 1.7 (1.2-2.4)                                | 1.0 (0.6-1.6)                             | 4.1 (1.5-11.2)                   | 0.3 (0.2-0.5)                     | 5.1 (2.4-10.6)                    |
| Nonspecific diagnosis, ref                                           | 1.0                             | 1.0                                          | 1.0                                       | 1.0                              | 1.0                               | 1.0                               |
| <b>Patient and complaint characteristics</b>                         |                                 |                                              |                                           |                                  |                                   |                                   |
| Younger (18-45 y) vs older (46-64 y)                                 | 1.2 (0.9-1.6)                   | 0.9 (0.6-1.6)                                | 1.0 (0.8-1.3)                             | 0.6 (0.4-0.8)                    | 1.0 (0.7-1.4)                     | 0.8 (0.4-1.6)                     |
| Female vs male                                                       | 0.7 (0.5-0.9)                   | 1.2 (0.7-2.1)                                | 1.3 (0.9-1.7)                             | 0.7 (0.5-1.0)                    | 1.4 (1.1-1.9)                     | 1.1 (0.5-2.5)                     |
| Not having paid work vs being employed                               | 0.8 (0.5-1.2)                   | 1.0 (0.6-1.9)                                | 1.2 (0.8-1.8)                             | 1.4 (0.8-2.4)                    | 0.8 (0.6-1.1)                     | 1.3 (0.5-3.2)                     |
| Duration of complaint at consultation: 0-6 wk (ref)                  | 1.0                             | 1.0                                          | 1.0                                       | 1.0                              | 1.0                               | 1.0                               |
| 6 wk-6 mo                                                            | 0.8 (0.6-1.1)                   | 2.1 (0.9-4.7)                                | 0.6 (0.5-0.8)                             | 1.4 (0.8-2.2)                    | 1.4 (0.8-2.8)                     | 4.3 (1.1-16.9)                    |
| > 6 mo                                                               | 0.5 (0.3-0.7)                   | 5.2 (2.6-10.5)                               | 0.9 (0.6-1.2)                             | 1.8 (1.2-2.7)                    | 2.5 (1.4-4.4)                     | 15.9 (5.4-47.0)                   |
| High complaint severity in last week (score > 6) vs low <sup>a</sup> | 0.5 (0.4-0.8)                   | 1.3 (0.7-2.4)                                | 1.6 (1.1-2.3)                             | 1.7 (1.3-2.4)                    | 1.5 (1.1-2.0)                     | 1.8 (0.7-4.1)                     |
| Many functional limitations (DASH score > 35.34) vs few <sup>b</sup> | 0.5 (0.4-0.7)                   | 1.4 (0.8-2.4)                                | 1.9 (1.4-2.7)                             | 1.8 (1.3-2.4)                    | 1.5 (1.1-2.0)                     | 2.2 (1.0-4.7)                     |
| Poor perceived general health vs good <sup>c</sup>                   | 0.8 (0.5-1.2)                   | 1.9 (0.8-4.3)                                | 1.0 (0.7-1.6)                             | 1.2 (0.6-2.2)                    | 1.7 (1.1-2.6)                     | 2.1 (1.1-4.2)                     |
| Musculoskeletal comorbidity vs none                                  | 0.8 (0.6-1.0)                   | 1.4 (0.8-2.1)                                | 1.2 (1.0-1.6)                             | 1.3 (0.9-1.7)                    | 1.2 (0.9-1.6)                     | 2.3 (1.0-4.9)                     |
| Recurrent complaint vs incident complaint                            | 0.6 (0.5-0.8)                   | 1.7 (1.1-2.8)                                | 0.9 (0.7-1.2)                             | 1.4 (0.9-2.1)                    | 2.0 (1.5-2.7)                     | 1.9 (1.0-3.6)                     |
| Multiple-region vs single-region complaint <sup>d</sup>              | 1.0 (0.7-1.3)                   | 2.3 (1.3-4.0)                                | 0.9 (0.7-1.2)                             | 1.1 (0.8-1.7)                    | 1.4 (1.0-2.0)                     | 1.5 (0.7-3.4)                     |
| Low social support (SOS score < 56) vs high <sup>e</sup>             | 1.0 (0.7-1.5)                   | 1.0 (0.5-1.8)                                | 1.0 (0.6-1.5)                             | 1.0 (0.8-1.4)                    | 1.2 (0.9-1.7)                     | 1.9 (0.6-5.7)                     |

Continued

**Supplemental Table 2. Univariate Associations With Common Management Options; Results of Univariate Logistic Regression Analyses (Multilevel), continued**

| Variables (continued)                                             | Watchful Waiting<br>OR (95% CI) | Additional Diagnostic Testing<br>OR (95% CI) | Prescription of Medication<br>OR (95% CI) | Steroid Injection<br>OR (95% CI) | Physical Therapist<br>OR (95% CI) | Medical Specialist<br>OR (95% CI) |
|-------------------------------------------------------------------|---------------------------------|----------------------------------------------|-------------------------------------------|----------------------------------|-----------------------------------|-----------------------------------|
| Somatization, 4DSQ <sup>f</sup>                                   |                                 |                                              |                                           |                                  |                                   |                                   |
| Low (score 0-10) (ref)                                            | 1.0                             | 1.0                                          | 1.0                                       | 1.0                              | 1.0                               | 1.0                               |
| Medium (score 11-20)                                              | 0.8 (0.6-1.3)                   | 1.8 (0.9-3.5)                                | 1.0 (0.7-1.5)                             | 0.9 (0.6-1.6)                    | 1.9 (1.3-2.6)                     | 1.9 (0.8-4.4)                     |
| High (score 21-32)                                                | 0.3 (0.2-0.7)                   | 5.0 (2.2-11.2)                               | 2.9 (1.5-5.6)                             | 2.1 (1.3-3.3)                    | 2.4 (1.2-4.7)                     | 5.8 (2.1-15.7)                    |
| Distress, 4DSQ <sup>f</sup>                                       |                                 |                                              |                                           |                                  |                                   |                                   |
| Low (score 0-10) (ref)                                            | 1.0                             | 1.0                                          | 1.0                                       | 1.0                              | 1.0                               | 1.0                               |
| Medium (score 11-20)                                              | 0.7 (0.4-1.2)                   | 1.3 (0.5-3.2)                                | 1.2 (0.7-1.9)                             | 1.2 (0.7-2.2)                    | 1.5 (1.1-2.1)                     | 1.6 (0.7-3.3)                     |
| High (score 21-32)                                                | 0.5 (0.3-0.9)                   | 2.0 (1.2-3.5)                                | 1.5 (0.9-2.6)                             | 1.6 (0.7-3.4)                    | 2.1 (1.2-3.2)                     | 2.7 (1.1-6.6)                     |
| <b>Physician characteristics</b>                                  |                                 |                                              |                                           |                                  |                                   |                                   |
| Female vs male                                                    | 1.2 (0.6-2.3)                   | 0.7 (0.2-1.9)                                | 0.6 (0.3-1.0)                             | 0.4 (0.1-1.6)                    | 1.6 (0.9-2.8)                     | 0.7 (0.2-2.6)                     |
| Few years of practice (< 13 y) vs many                            | 0.7 (0.5-1.1)                   | 2.5 (1.4-4.2)                                | 1.2 (0.7-1.9)                             | 1.1 (0.4-3.0)                    | 0.9 (0.8-1.7)                     | 2.2 (1.1-4.2)                     |
| Special interest in musculoskeletal complaints vs no              | 0.7 (0.5-1.2)                   | 1.1 (0.6-2.3)                                | 0.8 (0.5-1.1)                             | 2.5 (0.9-6.6)                    | 1.0 (0.8-1.4)                     | 1.4 (0.6-3.3)                     |
| Continuing medical education in musculoskeletal complaints vs not | 0.8 (0.5-1.4)                   | 1.0 (0.5-1.8)                                | 0.8 (0.5-1.1)                             | 2.0 (0.8-5.3)                    | 1.0 (0.7-1.4)                     | 1.2 (0.5-2.8)                     |
| Group practice vs solo practice                                   | 1.2 (0.8-1.9)                   | 0.5 (0.2-1.0)                                | 1.2 (0.8-1.8)                             | 0.6 (0.2-1.5)                    | 1.0 (0.7-1.4)                     | 0.6 (0.3-1.5)                     |
| Rural vs urban <sup>g</sup>                                       | 0.7 (0.4-1.3)                   | 1.6 (0.9-3.0)                                | 0.8 (0.5-1.3)                             | 1.8 (0.7-4.9)                    | 1.5 (1.0-2.5)                     | 1.0 (0.5-1.9)                     |

CI = confidence interval; DASH = Disability of Arm, Shoulder and Hand questionnaire; 4DSQ = Four-Dimensional Symptom Questionnaire; OR = odds ratio; ref = reference group; SOS = social support scale, a Dutch version of the Social Support Questionnaire.

<sup>a</sup> Scored on a range from 1-10 with 10 being the most severe, and 6 is the median.

<sup>b</sup> Each item scored on a 5-point Likert scale and summed and transferred to a score ranging from 0 (no disability) to 100 (completely disabled).<sup>1</sup>

<sup>c</sup> Based on the SF-12 Health Survey. Four answer categories dichotomized as poor (fair or poor) vs good (excellent or very good).<sup>2</sup>

<sup>d</sup> Defined regions are neck-shoulder, including neck; upper part of thoracic spine, shoulder and upper arm; elbow-forearm; and wrist-hand.<sup>3</sup>

<sup>e</sup> Scored on a range from 12 to 60; a higher score indicates more support.<sup>4</sup>

<sup>f</sup> Scored on a range from 0 to 32; a higher score indicates more somatization or distress.<sup>5</sup>

<sup>g</sup> Urbanization rate<sup>6</sup>: rural = addresses 1,000/km<sup>2</sup>; urban = addresses > 1,000/km<sup>2</sup>.

## References

1. Hudak PL, Amadio PC, Bombardier C; The Upper Extremity Collaborative Group (UECG). Development of an upper extremity outcome measure: the DASH (disabilities of the arm, shoulder and hand) [corrected]. *Am J Ind Med*. 1996;29(6):602-608.
2. Ware J Jr, Kosinski M, Keller SD. A 12-Item Short-Form Health Survey: construction of scales and preliminary tests of reliability and validity. *Med Care*. 1996;34(3):220-233.
3. Von Korff M, Jensen MP, Karoly P. Assessing global pain severity by self-report in clinical and health services research. *Spine*. 2000;25(24):3140-3151.
4. Feij JA, Doorn CD, van Kampen D, van den Berg PT, Resing WCM. Sensation seeking and social support as moderators of the relationship between life events and physical illness/psychological distress. In: Winnubst JAM, Maes S, editors. *Lifestyles Stress and Health*. Leiden: DSWO Press; 1992:285-302.
5. Terluin B, van Marwijk HW, Adèr HJ, et al. The Four-Dimensional Symptom Questionnaire (4DSQ): a validation study of a multidimensional self-report questionnaire to assess distress, depression, anxiety and somatization. *BMC Psychiatry*. 2006;6:34.
6. CBS. <http://statline.cbs.nl/statweb/>. Accessed Sep 20, 2006.
